# Supplementary material for: Reactive oxygen species leave a damage trail that reveals water channels in Photosystem II
Source: PubMed Central journal article supplement — Sci Adv. 2017 Nov 17;3(11):eaao3013. doi: 10.1126/sciadv.aao3013 (PMC5693562; doi:10.1126/sciadv.aao3013), 2017-11-17
Supplement: aao3013_SM.pdf [file aao3013_SM.pdf]

## Supplementary Materials for **Reactive oxygen species leave a damage trail that reveals water channels in Photosystem II**

Daniel A. Weisz, Michael L. Gross, Himadri B. Pakrasi

Published 17 November 2017, *Sci. Adv.* **3**, eaao3013 (2017)

DOI: 10.1126/sciadv.aao3013

### **The PDF file includes:**

- fig. S1. Example 1 of product-ion (MS/MS) spectra detected that identify oxidative modifications of PSII residues.
- fig. S2. Example 2 of product-ion (MS/MS) spectra detected that identify oxidative modifications of PSII residues.
- fig. S3. Example 3 of product-ion (MS/MS) spectra detected that identify oxidative modifications of PSII residues.
- table S1. Oxidative modifications included as variable modifications in the MS database searches.
- table S2. Oxidative modifications of PSII detected in this study.
- table S4. Oxidized residues that correspond to channels determined in previous MD studies.
- Legend for movie S1
- Reference (67)

### **Other Supplementary Material for this manuscript includes the following:**

(available at [advances.sciencemag.org/cgi/content/full/3/11/eaao3013/DC1](http://advances.sciencemag.org/cgi/content/full/3/11/eaao3013/DC1))

- table S3 (Microsoft Excel format). List of oxidized peptides detected in this study.
- movie S1 (.mp4 format). Rotation of Fig. 4A about the y axis.

## Supplementary Materials

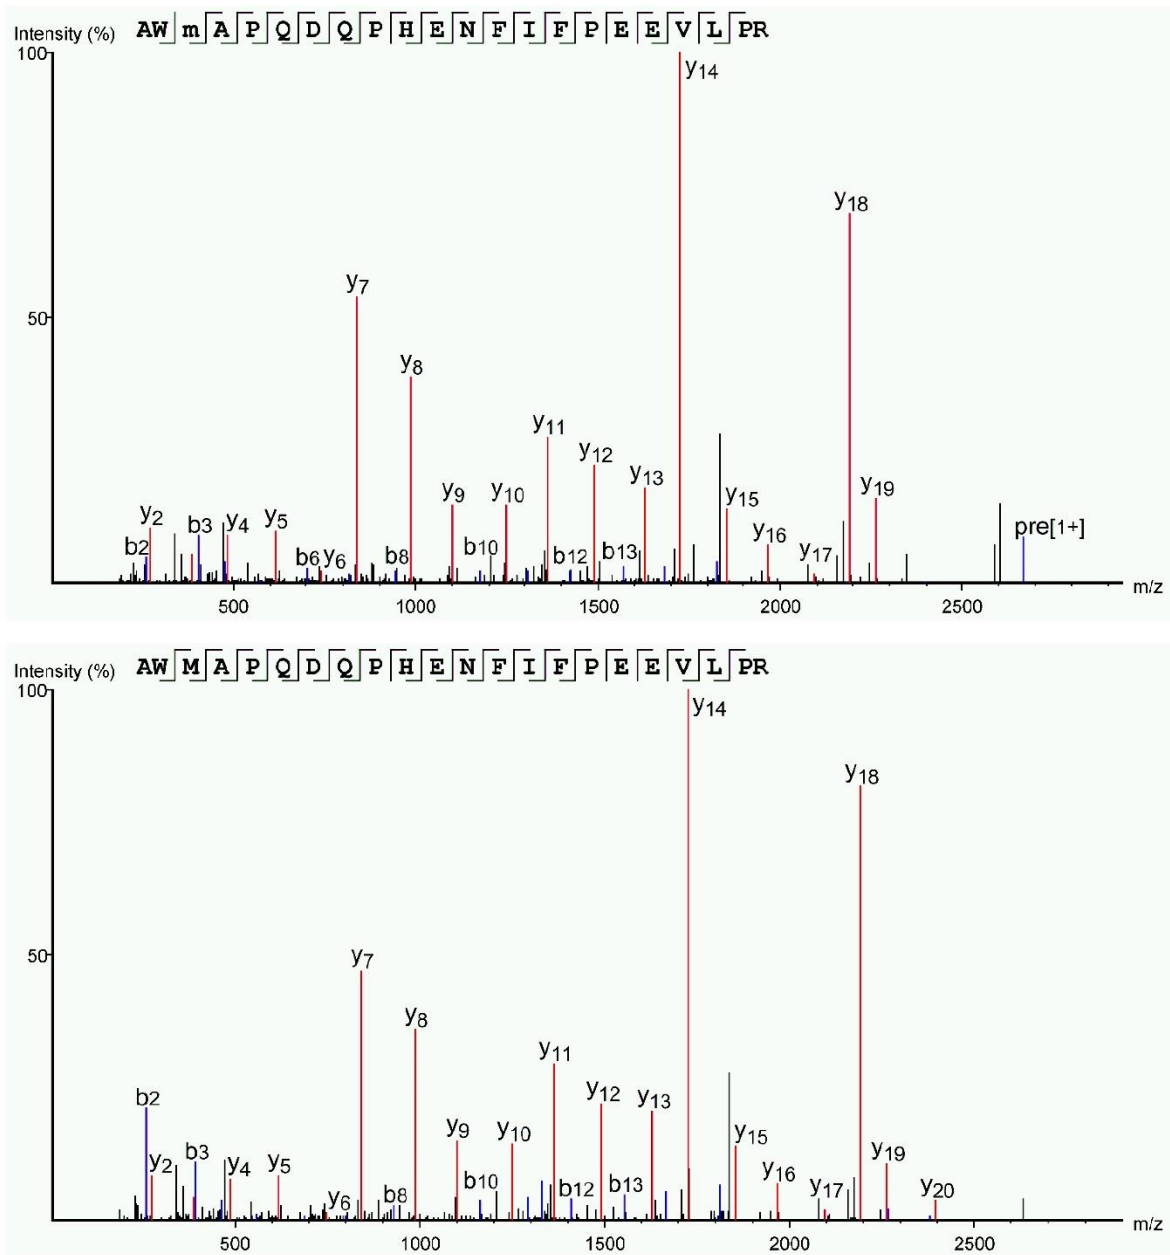

**fig. S1. Example 1 of product-ion (MS/MS) spectra detected that identify oxidative modifications of PSII residues.** Product-ion (MS/MS) spectra of the oxidized D2 peptide  $^{327}\text{AWmAPQDQPHENFIFPEEVLP}^{348}\text{R}$  (top) and the unmodified form of the peptide (bottom). The oxidation (+15.9949 Da) was localized to  $^{329}\text{M}$ . Lower-case lettering in the amino acid sequence indicates the site of oxidation.

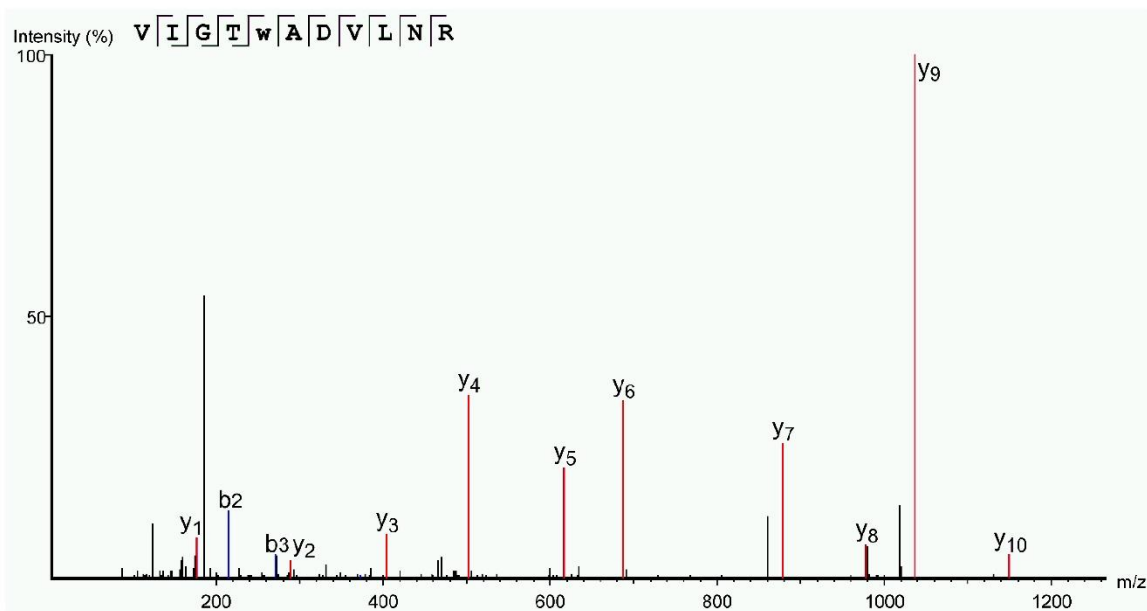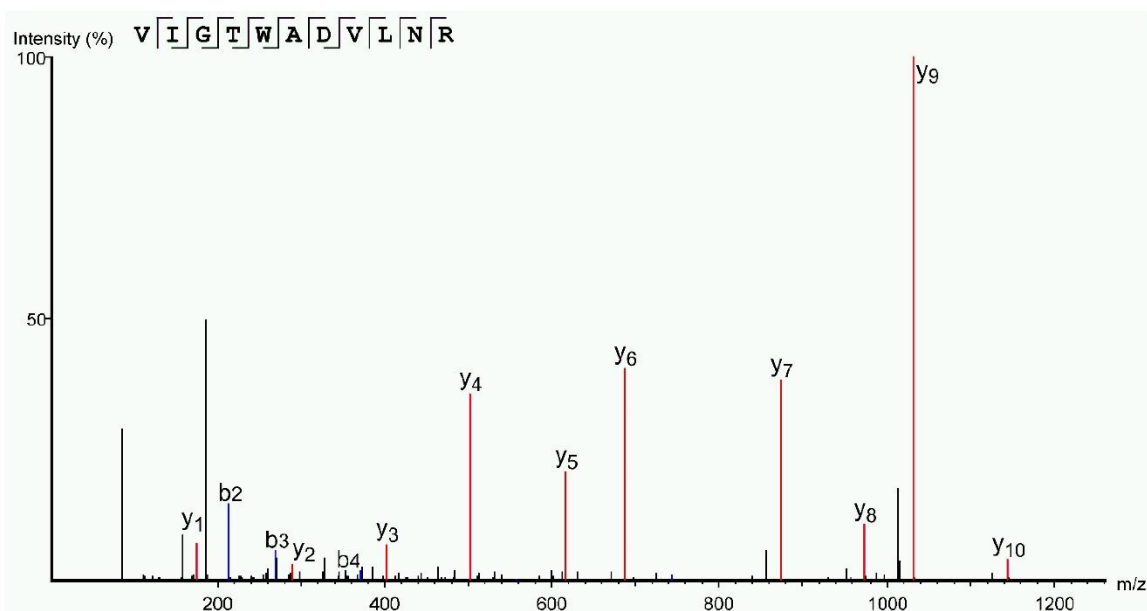

**fig. S2. Example 2 of product-ion (MS/MS) spectra detected that identify oxidative modifications of PSII residues.** Product-ion spectra of the oxidized D1 peptide  $^{313}\text{VIGTwADVLN}^{323}\text{R}$  (top) and the unmodified form of the peptide (bottom). The +3.9949 Da modification was identified as an oxidation of  $^{317}\text{W}$  to kynurenin. Lower-case lettering in the amino acid sequence indicates the site of oxidation.

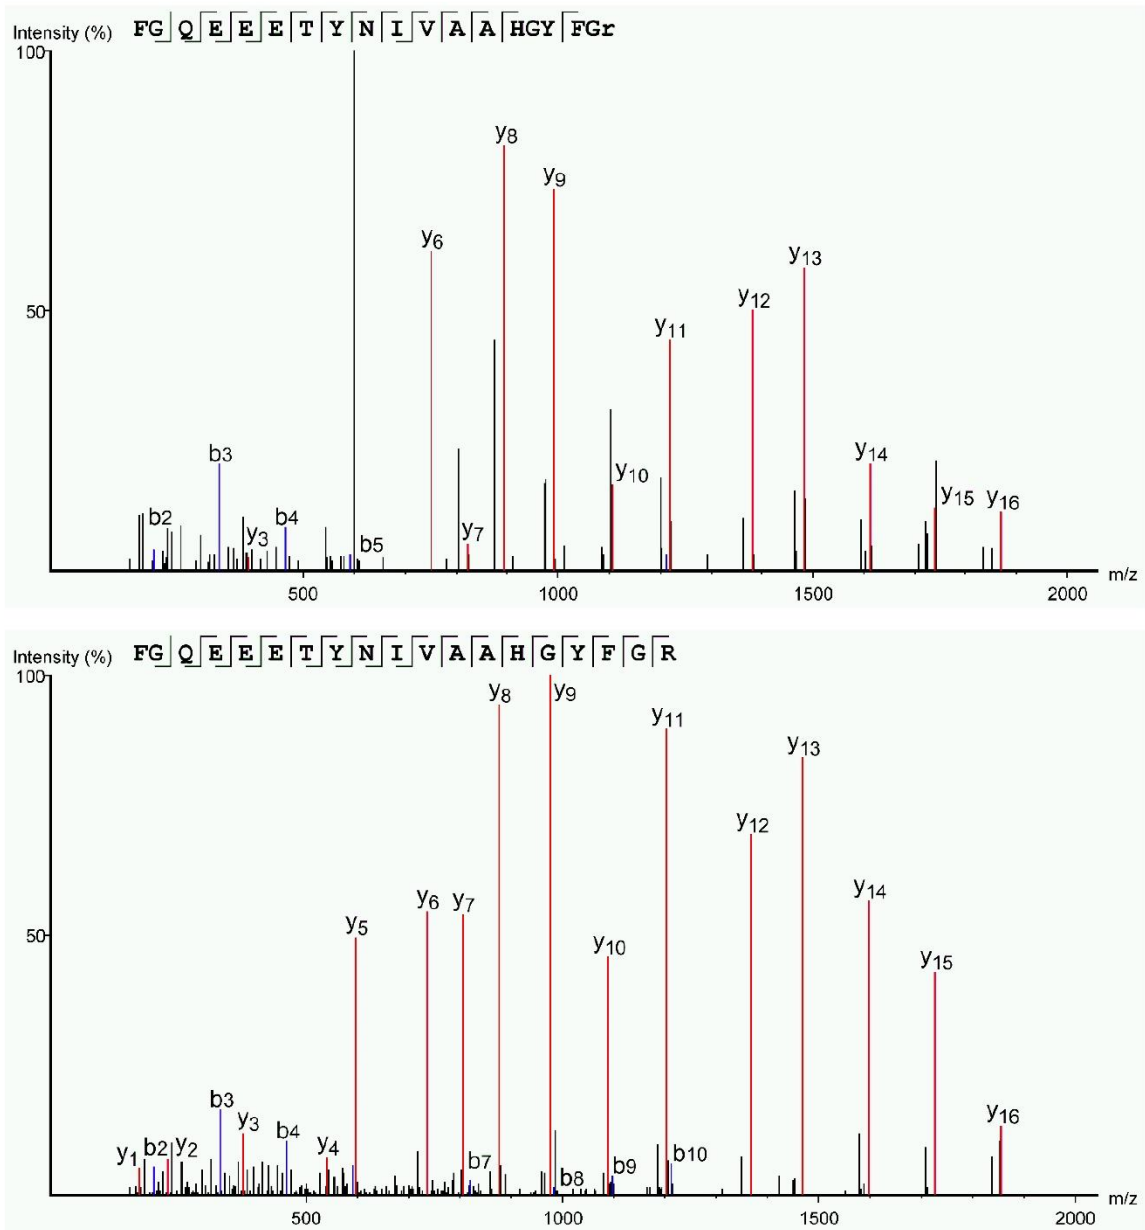

**fig. S3. Example 3 of product-ion (MS/MS) spectra detected that identify oxidative modifications of PSII residues.** Product-ion spectra of the oxidized D1 peptide  $^{239}\text{FGQEEETYNIVA AHGYFG}^{257}\text{r}$  (top) and the unmodified form of the peptide (bottom). The +13.9793 Da modification was identified as carbonylation of  $^{257}\text{R}$ . Note that although the fragmentation pattern appears to localize the modification only to one of  $^{255}\text{F}$ ,  $^{256}\text{G}$ , or  $^{257}\text{R}$ , the latter residue is the only one susceptible to this modification (see table S1). Lower-case lettering in the amino acid sequence indicates the site of oxidation.

**Table S1. Oxidative modifications included as variable modifications in the MS database searches [based on (67)].**

| <b>Oxidative modification</b>   | <b>Abbreviation</b> | <b>Mass change (Da)</b> | <b>Modifiable residues</b>              |
|---------------------------------|---------------------|-------------------------|-----------------------------------------|
| Methionine aldehyde             | mal                 | -32.0085                | M                                       |
| Decarboxylation                 | dcar                | -30.0105                | D,E                                     |
| Cysteine hydroxylation          | cysh                | -15.9772                | C                                       |
| Serine, threonine carbonylation | stcb                | -2.0157                 | S,T                                     |
| Tryptophan to kynurenine        | kyn                 | 3.9949                  | W                                       |
| Tryptophan to oxolactone        | oxol                | 13.9793                 | W                                       |
| Carbonylation                   | carb                | 13.9793                 | E,I,K,L,P,Q,R,V                         |
| General oxidation               | go                  | 15.9949                 | A,D,E,F,H,I,K,L,M,N,<br>P,Q,R,S,T,V,W,Y |
| Tryptophan to hydroxykynurenine | hkyn                | 19.9898                 | W                                       |
| Dihydroxylation                 | dihy                | 31.9898                 | C,F,K,P,R,W,Y                           |
| Methionine sulfone              | msul                | 31.9898                 | M                                       |
| Trihydroxylation                | trih                | 47.9847                 | F,W,Y                                   |

table S2. Oxidative modifications of PSII detected in this study.

| Residue   | Metal center    | Dist. to metal center (Å) | Ox. mod. <sup>b</sup> | B/SE <sup>c</sup> | Arm  | Residue          | Metal center   | Dist. to metal center (Å) | Ox. mod. <sup>b</sup> | B/SE <sup>c</sup> | Arm |   |   |
|-----------|-----------------|---------------------------|-----------------------|-------------------|------|------------------|----------------|---------------------------|-----------------------|-------------------|-----|---|---|
| <b>D1</b> |                 |                           |                       |                   |      | <b>CP43</b>      |                |                           |                       |                   |     |   |   |
| Y235      | Q <sub>A</sub>  | 17                        | go                    | SE                | *    | M21 <sup>d</sup> | -              | -                         | go                    | -                 |     |   |   |
| V249      | fQ <sub>B</sub> | 7                         | carb                  | SE                | *    | S29              | Q <sub>B</sub> | 30                        | stcb                  | SE                | *   |   |   |
| R257      | Q <sub>B</sub>  | 10                        | carb                  | SE                | *    | W34              | Q <sub>B</sub> | 23                        | dihy                  | SE                |     |   |   |
| T316      | OEC             | 25                        | stcb                  | B                 | 1    | *                | W35            | Q <sub>B</sub>            | 22                    | dihy              | SE  |   |   |
| W317      | OEC             | 23                        | kyn                   | B                 | 1    |                  | W150           | Q <sub>A</sub>            | 36                    | go                | SE  | * |   |
| V330      | OEC             | 9                         | carb                  | B                 | 1, 2 |                  | W188           | OEC                       | 29                    | dihy              | SE  | 3 |   |
| M331      | OEC             | 9                         | go                    | B                 | 1    |                  | L336           | OEC                       | 16                    | go                | B   | 3 |   |
| H332      | OEC             | 2                         | go                    | B                 | 1, 2 | *                | F350           | OEC                       | 14                    | go                | B   | 3 |   |
| E333      | OEC             | 6                         | carb                  | B                 | 1    | *                | T354           | OEC                       | 8                     | go                | B   | 3 |   |
| <b>D2</b> |                 |                           |                       |                   |      | M355             | OEC            | 10                        | go                    | B                 | 3   |   |   |
| W14       | Q <sub>B</sub>  | 35                        | go                    | SE                | *    | W358             | OEC            | 14                        | go                    | SE                | 3   |   |   |
| W21       | Q <sub>B</sub>  | 25                        | dihy                  | SE                | *    | D359             | OEC            | 16                        | go                    | SE                | 3   | * |   |
| S245      | Q <sub>A</sub>  | 8                         | go                    | B                 | *    | W364             | OEC            | 23                        | go                    | B                 | 3   |   |   |
| M246      | Q <sub>A</sub>  | 7                         | go                    | SE                |      | E366             | OEC            | 24                        | dcar                  | SE                | 3   |   |   |
| W253      | Q <sub>A</sub>  | 5                         | dihy                  | B                 | *    | P367             | OEC            | 27                        | dihy                  | SE                | 3   |   |   |
| F314      | OEC             | 12                        | go                    | B                 | 1    | *                | P371           | OEC                       | 28                    | dihy              | SE  | 3 |   |
| Y315      | OEC             | 15                        | go                    | B                 | 1    | *                | D375           | OEC                       | 25                    | dcar              | SE  | 3 |   |
| M325      | OEC             | 15                        | go                    | B                 | 1    |                  | P385           | OEC                       | 28                    | go                | SE  | 3 | * |
| A327      | OEC             | 19                        | go                    | B                 | 1    | *                | W386           | OEC                       | 27                    | kyn               | SE  | 3 |   |
| W328      | OEC             | 17                        | oxolr                 | SE                | 1, 2 |                  | E393           | OEC                       | 20                    | carb              | B   | 2 |   |
| M329      | OEC             | 19                        | go                    | B                 | 1    |                  | M395           | OEC                       | 14                    | go                | B   | 2 |   |
| A330      | OEC             | 22                        | go                    | B                 | 1    | *                | T396           | OEC                       | 16                    | stcb              | B   | 2 |   |
| P331      | OEC             | 24                        | carb                  | SE                | 1    |                  | S402           | OEC                       | 11                    | stcb              | B   | 2 |   |
| P335      | OEC             | 29                        | go                    | SE                | 1    |                  | L403           | OEC                       | 18                    | carb              | B   | 2 |   |
| E337      | OEC             | 30                        | go                    | SE                | 1    | *                | S405           | OEC                       | 19                    | stcb              | B   | 2 |   |
|           |                 |                           |                       |                   |      |                  | M468           | Q <sub>A</sub>            | 18                    | go                | SE  |   |   |

Green, nearest to Q<sub>A</sub> site; purple, nearest to Q<sub>B</sub> site; red, nearest to Mn<sub>4</sub>Ca cluster (OEC)

\* only detected in light-exposed sample

<sup>a</sup>Residue numbering in this table and throughout follows the *Synechocystis* 6803 sequence. For the D1 and D2 proteins, this numbering matches the crystal structure (PDB 3WU2, 3ARC); for CP43, residues numbers are one lower than in the crystal structure.

<sup>b</sup>Ox. mod., oxidative modification. For many residues, multiple types of oxidative modifications were observed, though only one type is listed for each residue.

<sup>c</sup>B/SE, buried/solvent-exposed.

<sup>d</sup>CP43-M21 was not resolved in the PSII crystal structure (PDB 3WU2)

**table S4. Oxidized residues that correspond to channels determined in previous MD studies.**

| <b>MD-determined channel</b>                       | <b>Oxidized residues that correspond to MD-determined channel</b>      |
|----------------------------------------------------|------------------------------------------------------------------------|
| Channel 3 (26, 27)                                 | D1- V330, M331, H332, E333<br>D2- F314, Y315, M325<br>CP47- M359, E364 |
| Channels 4a, 4ai (26, 27)<br>(large channel in 23) | D1- V330, H332<br>D2- W328<br>CP43- E393, M395, T396, S402, L403, S405 |

**movie S1. Rotation of Fig. 4A about the y axis.** This video shows a complete 360° view of the oxidized residues discussed in this study and their correspondence to channels 3 and 4a/4ai in (26, 27).
